# Supplementary material
Source: PubMed Central journal article supplement (PMC3235950)
Supplement: NIHMS336020-supplement-01.pdf [file NIHMS336020-supplement-01.pdf]

# THE LANCET Oncology

## Supplementary webappendix

This webappendix formed part of the original submission and has been peer reviewed. We post it as supplied by the authors.

Supplement to: Regan MM, Neven P, Giobbie-Hurder A, et al, for the members of the BIG 1-98 Collaborative Group and the International Breast Cancer Study Group (IBCSG). Assessment of letrozole and tamoxifen alone and in sequence for postmenopausal women with steroid hormone receptor-positive breast cancer: the BIG 1-98 randomised clinical trial at 8.1 years median follow-up. *Lancet Oncol* 2011; published online Oct 21. DOI:10.1016/S1470-2045(11)70270-4.

Webappendix: Supplementary information for “Assessment of letrozole and tamoxifen alone and in sequence for postmenopausal women with steroid hormone receptor-positive breast cancer: the BIG 1-98 Randomised clinical trial at 8.1 years median follow-up”

## **Contents**

Section 1: BIG 1-98 Collaborative Group Participants  
Pages 2-7

Section 2: Supplementary Tables and Figures  
Pages 8-12

Figure A1, p 8: Consort diagram describing BIG 1-98 monotherapy and sequential treatment analysis populations

Table A1, p 9: Monotherapy analysis: Sites of first disease-free survival (DFS) event at 8.7 years median follow-up

Table A2, p 9: Table A2. Sequential treatment analysis: Sites of first disease-free survival (DFS) event at 8.0 years median follow-up

Table A3, p 10: Sequential treatment analysis: 5-year and 8-year estimates of the four endpoints calculated by the Kaplan-Meier method.

Figure A2, p 11: Kaplan-Meier Plots for the Sequential Treatment Analysis: (A) disease-free survival (DFS); (B) overall survival (OS); (C) distant recurrence-free interval (DRFI); and (D) breast cancer-free interval (BCFI)

Figure A3, p 12: Subpopulation Treatment Effect Pattern Plot (STEPP) analysis of 5-year disease-free survival (DFS) according to level of composite measure of prognostic risk (A) among all patients, (B) according to treatment assignment

## Section 1. BIG 1-98 Collaborative Group Participants

**Steering Committee:** B. Thürlimann (Chair), S. Aebi, L. Blacher, H. Bonnefoi, A. S. Coates, T. Cufer, B. Ejlertsen, J. F. Forbes, R. D. Gelber, A. Giobbie-Hurder, A. Goldhirsch, A. Hiltbrunner, S. B. Holmberg, R. Maibach, A. Martoni, L. Mauriac, G. MacGrogan, H. T. Mouridsen, R. Paridaens, D. Phuong, K. N. Price, M. Rabaglio, B.B. Rasmussen, M.M. Regan, A. Santoro, I. E. Smith, A. Wardley, G. Viale. Novartis: H. A. Chaudri-Ross, S. Segal.

**IBCSG Foundation Council** (members from 1998 to 2010): S. Aebi, A. S. Coates, M. Colleoni, J. P. Collins, H. Cortés Funes, R. D. Gelber, A. Goldhirsch, M. Green, A. Hiltbrunner, S. B. Holmberg, P. Karlsson, I Kössler, I. Láng, J. Lindtner, F Paganetti, M. de Stoppani, C.-M. Rudenstam, H.-J. Senn, R. Stahel, B. Thürlimann, A. Veronesi.

**Coordinating Center** (Berne, Switzerland): M. Castiglione (Chief Executive Officer 1998 – 2007), A. Hiltbrunner (Director), M. Rabaglio, G. Egli, H. Hawle, B. Cliffe, S. Ribeli-Hofmann, F. Munarini, R. Kammler, R. Studer, B. Ruepp, R. Maibach, N. Munarini.

**Statistical Center** (Dana-Farber Cancer Institute, Boston, MA, USA): R. D. Gelber (Director) , M.M. Regan (Group Statistician), K. N. Price (Director of Scientific Administration), A. Giobbie-Hurder (Trial Statistician), A. Keshaviah , H. Litman, B.F. Cole, Z. Sun, P.K. Gray, H. Huang, L. J. Somos, B. Timmers, L. Nickerson.

**Data Management Center** (Frontier Science & Technology Research Foundation, Amherst, NY, USA): L. Blacher (Director of Data Management), T. Heckman Scolese (Coordinating Data Manager), M. Belisle, M. Caporale, J. Celano, L. Dalfonso, L. Dooley, S. Fischer, K. Galloway, J. Gould, R. Hinkle, M. Holody, G. Jones, R. Krall, S. Lippert, J. Meshulam, L. Mundy, A. Pavlov-Shapiro, K. Scott, M. Scott, S. Shepard, J. Swick, L. Uhteg, D. Weinbaum, C. Westby, T. Zielinski.

**Central Pathology Review Office** (University of Glasgow, Glasgow, UK): B. A. Gusterson, E. Mallon; (European Institute of Oncology, Division of Pathology, Milano, Italy): G. Viale, P. Dell’Orto, M. Mastropasqua, B. Del Curto.

**Study Support** (Novartis Corp. Basel, Switzerland): E. Waldie, I. van Hooymissen, M. De Smet, U. Trostmann, W. Schmidt, A. Bolton, W. Hackl.

### *Breast International Group (BIG)*

#### **International Breast Cancer Study Group (IBCSG)**

**Australian New Zealand Breast Cancer Trials Group (ANZ BCTG):** R. D. Snyder, J. Chirgwin, J. F. Forbes, A. S. Coates, F. Boyle, D. Lindsay, D. Preece, J. Cowell, D. Talbot, A. Whipp.

**Australia: The Cancer Council Victoria**, Melbourne, VIC: F. Abell, R. Basser, R. Bell, B. Brady, D. Blakey, P. Briggs, I. Burns, P. Campbell, M. Chao, J. Chirgwin, B. Chua, K. Clarke, J. Collins, R. De Boer, J. C. Din, R. Doig, A. Dowling, R. Drummond, N. Efe, S. T. Fan, M. Francis, P. Francis, V. Ganju, P. Gibbs, G. Goss, M. Green, P. Gregory, J. Griffiths, I. Haines, M. Henderson, R. Holmes, P. James, J. Kiffler, M. Lehman, M. Leyden, L. Lim, G. Lindeman, R. Lynch, B. Mann, J. McKendrick, S. McLachlan, R. McLennan, G. Mitchell, S. Mitra, C. Murphy, I. Parker, K. Phillips, I. Porter, G. Richardson, J. Scarlet, S. Sewak, J. Shapiro, R. Snyder, R. Stanley, C. Steer, D. Stoney, A. Strickland, G. Toner, C. Underhill, K. White, M. White, A. Wirth, S. Wong; **W P Holman Clinic, Launceston General Hospital**, Launceston, Tasmania: D. Byram, I. Byard; **Liverpool Hospital**, Sydney, NSW: S. Della-Fiorentina, A. Goldrick, E. Hovey, E. Moylan, E. Segelov; **Mount Hospital, Perth**, WA: A. Chan, M. Buck, D. Hastrich, D. Ingram, G. Van Hazel, P. Willsher; **Nepean Cancer Care Centre, Sydney**, NSW: N. Wilcken, C. Crombie; **Calvary Mater Newcastle**, Newcastle, NSW: J. F. Forbes, F. Abell, S. Ackland, A. Bonaventura, S. Cox, J. Denham, R. Gourlay, D. Jackson, R. Sillar, J. Stewart; **Prince of Wales Hospital, Sydney**, NSW: C. Lewis, B. Brigham, D. Goldstein, M. Friedlander; **Princess Alexandra Hospital**, Woollongabba, QLD: E. Walpole, D.

Thompson; **Royal Adelaide Hospital**, Adelaide, SA: P. G. Gill, M. Bochner, J. Coventry, J. Kollias, P. Malycha, I. Olver; **Royal Brisbane and Women's Hospital**, Brisbane, QLD: M. Colosimo, R. Cheuk, L. Kenny, N. McCarthy, D. Wyld; **Royal Hobart Hospital**, Hobart, Tasmania: R. Young, R. Harrup, R. Kimber, R. Lowenthal; **Royal Perth Hospital**, Perth, WA: J. Trotter, E. Bayliss, A. Chan, D. Ransom; **Sir Charles Gairdner Hospital**, Perth, WA: M. Byrne, M. Buck, J. Dewar, A. Nowak, A. Powell, G. Van Hazel; **Toowoomba Hospital**, Toowoomba, QLD: E. A. Abdi, R. Brodribb, Z. Volobueva; **Westmead Hospital, Sydney**, NSW: P. Harnett, V. Ahern, H. Gurney, N. Wilcken.

**New Zealand: Auckland Hospital**, Auckland: V. J. Harvey, B. Evans, W. Jones, M. McCrystal, D. Porter, P. Thompson, M. Vaughan; **Christchurch Hospital**, Christchurch: D. Gibbs, C. Atkinson, R. Burcombe, B. Fitzharris, B. Hickey, M. Jeffery, B. Robinson; **Dunedin Hospital**, Dunedin: B. McLaren, S. Costello, J. North, D. Perez; **Waikato Hospital, Hamilton**: I. D. Campbell, L. Gilbert, R. Gannaway, M. Jameson, I. Kennedy, J. Long, G. Round, L. Spellman, D. Whittle, D. Woolerton.

**Brazil: Hospital de Clinicas de Porto Alegre**, Porto Alegre: C. Menke, J. Biazús, R. Cericatto, J. Cavalheiro, N. Xavier, A. Bittelbrunn, E. Rabin.

**Chile: Chilean Cooperative Group for Oncologic Research, GOCCHI**: J. Gutiérrez (Chairman), R. Arriagada (Scientific Adviser), L. Bronfman (Principal Investigator), M. Zuñiga (Data Manager); **Clinica Las Condes, Santiago**: J. Gutiérrez, J. C. Acevedo, S. Torres, A. León, E. Salazar; **Hospital DIPRECA, Las Condes, Santiago**: L. Soto Diaz, R. Duval, N. Oddeshede, M. C. Venti; **Hospital San Juan de Dios, Santiago**: K. Peña, L. Puente, V. Maidana; **IRAM / Instituto de Radiomedicina, Vitacura, Santiago**: R. Baeza, R. Arriagada, P. Olfos, J. Solé, E. Vinés, C. Mariani.

**Hungary: National Institute of Oncology, Budapest**: I. Láng, E. Hitre, E. Szabó, Z. Horváth, E. Ganofszy, E. Juhos.

**Italy: Centro di Riferimento Oncologico, Aviano**: A. Veronesi, D. Crivellari, M. D. Magri, A. Buonadonna, F. Coran, E. Borsatti, E. Candiani, S. Massarut, M. Roncadin, M. Arcicasa, A. Carbone, T. Perin, A. Gloghini; **Ospedali Riuniti di Bergamo**, Bergamo: C. Tondini, R. Labianca, P. Poletti, A. Bettini; **Ospedale degli Infermi, Biella**: M. Clerico, M. Vincenti, A. Malossi, E. Seles, E. Perfetti, B. Sartorello; **Spedali Civili, Brescia**: E. Simoncini, G. Marini, P. Marpicati, R. Farfaglia, A. M. Bianchi, P. Grigolato, L. Lucini, P. Frata, A. Huscher, E. Micheletti, C. Fogazzi; **U. O. Medicina Oncologica, Ospedale Capri**, **Ospedale Mirandola**: F. Artioli, K. Cagossi, L. Scaltriti, E. Bandieri, L. Botticelli, G. Giovanardi; **Ospedale di Cattolica "Cervesi", Cattolica**: A. Ravaioli, E. Pasquini, B. Rudnas; **Ospedale Civile, Gorizia**: L. Foghin; **Ospedale "A. Manzoni" Lecco**, Lecco: M. Visini, L. Zavallone, G. Ucci; **Istituto Europeo di Oncologia, Milano**: M. Colleoni, G. Viale, P. Veronesi, G. Peruzzotti, L. Corsetto, R. Ghisini, G. Renne, A. Luini, L. Orlando, R. Torrisi, A. Rocca, T. De Pas, E. Munzone, V. Galimberti, S. Zurrada, M. Intra, F. Nolé, R. Orecchia, G. Martinelli, F. de Braud, A. Goldhirsch; **Ospedale Infermi, Rimini**: A. Ravaioli, L. Gianni.

**Peru: Instituto de Enfermedades Neoplásicas, Lima**: H. Gome.

**Slovenia: Institute of Oncology, Ljubljana**: T. Cufer, B. Pajk, J. Cervek.

**South Africa: Groote Schuur Hospital and University of Cape Town**, Cape Town: I. D. Werner, E. Murray, D. Govender, S. Dalvie, T. Erasmus, B. Robertson, B. Read, E. Nel, J. Toop, N. Nedeva, E. Panieri; **Sandton Oncology Centre, Johannesburg**: D. Vorobiof, M. Chasen, G. McMichael, C. Mohammed. Local funding provided by the **Cancer Association of South Africa**

**Sweden: West Swedish Breast Cancer Study Group:** S. B. Holmberg; Sahlgrenska U Hospital, Moelndal: S. B. Holmberg, J. Mattsson; Boras Hospital, Boras; Karlstads Hospital, Karlstads: H. Sellström; Kungälv Hospital, Kungälv: B. Lindberg.

**Switzerland: Swiss Group for Clinical Cancer Research (SAKK):** A. Goldhirsch (up to January 2004), R. Herrmann (2004-2010), B. Thürlimann (from 2010) : **Kantonsspital Aarau, Zentrum f. Onkologie, Aarau:** A. Schönenberger, W. Mingrone, Ch. Honegger, E. Bärtschi, M. Neter, M. Rederer, G. Schär; **University Hospital Basel, Basel:** C. Rochlitz, R. Herrmann, D. Oertli, E. Wight, H. Moch; **Institute of Oncology of Southern Switzerland: Ospedale San Giovanni, Bellinzona:** J. Bernier, L. Bronz, F. Cavalli, E. Gallerani, A. Richetti, A. Franzetti; **Ospedale Regionale di Lugano (Civico & Italiano), Lugano:** M. Conti-Beltraminelli, M. Ghielmini, T. Gyr, S. Mauri, P. C. Saletti; **Ospedale Regionale Beata Vergine, Mendrisio:** A. Goldhirsch, O. Pagani, R. Graffeo, M. Locatelli, S. Longhi, P.C. Rey, M. Ruggeri; **Ospedale Regionale La Carità, Locarno:** E. Zucca, D. Wyss; **Istituto Cantonale di Patologia, Locarno:** L. Mazzucchelli, E. Pedrinis, T. Rusca; **Inselspital, Berne:** S. Aebi, M. F. Fey, M. Castiglione, M. Rabaglio; **Kantonsspital Olten, Olten:** S. Aebi, M. F. Fey, M. Zuber, G. Beck; **Bürgerspital, Solothurn:** S. Aebi, M. F. Fey, R. Schönenberger; **Spital Thun-Simmental AG Thun:** J.M. Lüthi, D. Rauch; **Hôpital Cantonal Universitaire HCUG, Geneva:** H. Bonnefoi; **Rätisches Kantons- und Regionalspital, Chur:** F. Egli, R. Steiner, P. Fehr; **Centre Pluridisciplinaire d'Oncologie, Lausanne:** L. Perey, P. de Grandi, W. Jeanneret, S. Leyvraz, J.-F. Delaloye; **Kantonsspital St. Gallen, St. Gallen:** B. Thürlimann, D. Köberle, F. Weisser, S., Mattmann, A. Müller, T. Cerny, B. Späti, M. Höfliger, G. Fürstenberger, B. Bolliger, C. Öhlschlegel, U. Lorenz, M. Bamert, J. Kehl-Blank, E. Vogel; **Kantonales Spital Herisau, Herisau:** B. Thürlimann, D. Hess, I. Senn, D. Köberle, A. Ehrsam, C. Nauer, C. Öhlschlegel, J. Kehl-Blank, E. Vogel; **Stadtspital Triemli, Zürich:** L. Widmer, M. Häfner; **Universitätsspital Zürich, Zürich:** B. C. Pestalozzi, M. Fehr, R. Caduff, Z. Varga, R. Trüb, D. Fink.

**Swiss Private MDs:** Private Praxis, Zürich: B. A. Bättig; Sonnenhof-Klinik Engeried, Berne: K. Buser; Frauenklinik Limmattalspital, Schlieren: N. Bürki; Private Praxis, Birsfelden: A. Dieterle; Private Praxis, Biel: L. Hasler; Private Praxis, Baar: M. Mannhart-Harms; Brust-Zentrum, Zürich: C. Rageth; Private Praxis, Berne: J. Richner; Private Praxis, Bellinzona: V. Spataro; Private Praxis, Winterthur: M. Umbricht.

**United Kingdom: King's College Hospital/Breast Unit, London:** P. Ellis, S. Harris, N. Akbar, H. McVicars, C. Lees, R. Raman, G. Crane.

#### **Danish Group (DBCG)**

B. Ejlersten, H. T. Mouridsen; **Rigshospitalet, Copenhagen:** H. T. Mouridsen; **Vejle Hospital, Vejle:** E. Jakobsen; **Odense University Hospital, Odense:** S. Cold; **KAS Herlev / Herlev University Hospital, Herlev:** C. Kamby; **Aalborg Sygehus Syd, Aalborg:** M. Ewertz; **Hilleroed Hospital, Hilleroed:** P.M. Vestlev; **Aarhus University Hospital, Aarhus:** J. Andersen; **Roskilde County Hospital, Roskilde:** P. Grundtvig; **Esbjerg Central Hospital, Esbjerg:** E. Sandberg; **Naestved Central Hospital, Naestved:** P. Philip; **Soenderborg Sygehus, Soenderborg:** E. L. Madsen; **Herning Central Hospital, Herning:** K. A. Moeller; **Viborg Sygehus, Viborg:** V. Haahr; **Landspítali University Hospital, Reykjavik, Iceland:** J. Johansson.

#### **French Group (FNCLCC)**

**Institut Bergonié, Bordeaux:** L. Mauriac, M. Debled, H. Bonnefoi, P. Campo; **Centre Hospitalier de la Côte Basque, Bayonne:** D. Larregain-Fournier, S. Remy; **Centre Jean Perrin, Clermont-Ferrand:** H. Auvray; **Centre Georges François Leclerc, Dijon:** C. De Gislain, F. Delille, M.-C. Porteret; **Centre Oscar Lambret, Lille:** V. Servent, M. Chapoutier; **CHRU, Limoges:** N. Tubiana-Mathieu, S. Lavau-Denes, P. Bosc; **Centre Léon Bérard, Lyon:** J. P. Guastalla, Th. Bachelot, C. Arbault; **Centre Hospitalier Meaux, Meaux:** G. Netter-Pinon; **C.H.G. André Bouloche, Montbéliard:** V. Perrin, A. Monnier, Y. Hammoud; **Centre Paul Lamarque, Montpellier:** G.

Romieu, L. Culine, V. Pinosa; **Clinique Francheville, Périgueux**: L. Cany, C. Maguire; **Hôpital de la Milétrie, Poitiers**: A. Daban, M. Le Saux, C. Grandon; **Centre Eugène Marquis, Rennes**: P. Kerbrat, C. Catheline; **Centre Henri Becquerel, Rouen**: C. Veyret, E. Jugieau, V. Talon; **Centre René Gauducheau, Saint-Herblain**: A. Le Mevel, S. Maury; **Centre Claudius Régaud, Toulouse**: L. Gladieff, N. Lignon.

#### **North Yorkshire Group**

D. Dodwell; **Harrogate District Hospital, Harrogate**, North Yorkshire: D. Dodwell; **Huddersfield Royal Infirmary, Huddersfield**: J. Joffe; **Castlehill Hospital, Hull**: P. Drew; **Airedale General Hospital, Keighley**, W. Yorkshire: A. Nejim; **Leeds General Infirmary, Leeds**: D. Dodwell, K. Horgan; **St. James's University Hospital, Leeds**: M. Lansdown, T. Perren; **Weston Park Hospital, Sheffield**: R. E. Coleman.

#### **INDEPENDENT CENTERS/GROUPS**

**Argentina**: **Centro Oncológico Confidence, Buenos Aires**: D. Campos; **Hospital Alemán, Buenos Aires**: F. Cóppola; **Hospital Británico, Buenos Aires**: J. Martinez; **Hospital Evita, Buenos Aires**: M. Freue; **Hospital Posadas, Buenos Aires**: C. Wainstein; **Hospital Zubizarreta, Buenos Aires**: A. Zori Comba; **Instituto Dr. Estevez, Buenos Aires**: E. Cazap; **Instituto Oncológico Dr. Angel H. Roffo, Buenos Aires**: E. Mickiewicz; **Sanatorio Municipal Julio A. Mendez, Buenos Aires**: L. Balbiani; **Centro Privado de Ginecología, Córdoba**: A. Osuna; **Hospital Privado de Córdoba, Córdoba**: E. Palazzo; **Instituto Modelo de Ginecología y Obstetricia, Córdoba**: M. de Romedis; **Fundación Mainetti-Centro Oncológico de Excelencia, La Plata**: S. Cagnolati; **Hospital Privado de la Comunidad, Mar del Plata**: C. A. Delfino, G. Caccia; **Escuela de Medicina Nuclear (COIR), Mendoza**: R. L. de Angelis; **Centro Oncológico de Rosario, Rosario**: L. Fein, R. Sala; **Hospital Provincial de Rosario, Rosario**: C. Nassurdi, A. Colombo Berra; **Clínica Especializada ISIS, Santa Fe**: R. Viroglio, C. Blajman; **Hospital Regional de Concepción, Tucumán**: H. Requejo; **Instituto de Maternidad y Ginecología Nuestra Señoras de las Mercedes, Tucumán**: L. Silberman.

**Australia**: **Flinders Medical Centre, Adelaide**, SA: S. Birrell, M. Eaton, C. Hoffman; **Queen Elizabeth Hospital, Adelaide**, SA: V. Humeniuk; **The Canberra Hospital, Canberra**, ACT: P. Craft, R. Stuart-Harris, D. Yip; **The Geelong Hospital, Geelong**, VIC: R. Bell, F. Abell, M. Francis, J. Kiffer, R. Lynch, R. McLennan, K. White; **Royal Melbourne Hospital, Melbourne**, VIC: M. Green, R. Bassar, J. Collins, R. De Boer, J. C. Din, N. Efe, S. T. Fan, G. Lindeman, S. Wong; **Western General Hospital, Melbourne**, VIC: M. Green, R. Bassar, J. Collins, R. De Boer, J. C. Din, N. Efe, S. T. Fan, G. Lindeman, S. Wong; **Newcastle Mater Hospital, Newcastle**, NSW: J. Stewart, F. Abell, S. Ackland, A. Bonaventura; **Royal Perth Hospital, Perth**, WA: J. Trotter, E. Bayliss, A. Chan, D. Ransom, A. Redfern; **St. George Hospital, Sydney**, NSW: P. de Souza, M. Links; **St. Vincent's Hospital, Sydney**, NSW: D. Dalley, J. Grygiel, R. Ward; **Murray Valley Private Hospital, Wodonga**, VIC: C. Underhill, K. Clarke, C. Steer; **Princess Alexandra Hospital, Woolloongabba**, QLD: E. Walpole, D. Thompson.

**Belgium**: **Institut Jules Bordet, Bruxelles**: J. M. Nogaret; **University Hospitals Leuven, Leuven**: M.R. Christiaens, P. Neven, R. Paridaens, A. Smeets, I. Vergote, C. Weltens, H. Wildiers; **Les Cliniques Saint-Joseph ASBL, Liège**: C. Focan; **Clinique du Parc Léopold, Bruxelles**: L. Marcelis; **C. H. Etterbeek - Ixelles, Bruxelles**: J. P. Kains; **Service d'Oncologie Clinique Notre-Dame, Charleroi**: J.-L. Canon; **C. H. U. André Vèsale, Montigny-Le Tilleul**: D. Brohèe.

**Canada**: **Cambridge Memorial Hospital, Cambridge**: J. Gowing; **CHUM- Campus Notre-Dame, Montreal**: L. Yelle; **Hôpital Maisonneuve-Rosemont, Montreal**: P. Dubé.

**Chile**: **Fundacion Lopez Perez, Santiago**: C. Vogel; **Hospital Carlos Van Buren, Valparaiso**: M. León Prieto.

**Czech Republic**: **Institute of Oncology, Brno**: K. Petrakova, M. Palacova, R. Demlova; **Dept. of Clinical and Radiation Oncology, Ceske Budejovice**: H. Siffnerova, J. Fischer, I. Bustova; **Centre of Breast Diseases, Prague**:

H. Kankova, M. Pintova; **Institute of Radiation Oncology, Prague:** P. Vitek; **University Hospital, Prague:** J. Abrahamova, D. Kordikova; **University Hospital Prague:** L. Petruzelka, E. Sedlackova, H. Honova.

**Germany:** Onkologische Gemeinschaftspraxis, Augsburg: B. Heinrich; **Zentralklinikum/Frauenklinik, Augsburg:** A. Wischnik; **Universitätsklinikum Essen, Essen:** C. Oberhoff, A. E. Schindler; **Universitäts-Frauenklinik d. JLU Giessen, Giessen:** K. Münstedt; **Onkologische Gemeinschaftspraxis, Göttingen:** D. Meyer; **Martin-Luther-Universität Halle-Wittenberg, Halle:** R. Grosse, H. Kölbl; **Universitätskliniken des Saarlandes, Homburg:** W. Schmidt, D. Mink; **Universitäts-Frauenklinik und Poliklinik Universitätskrankenhaus Eppendorf, Hamburg:** F. Jänicke; **Kliniken d. Med. Hochschule, Frauenklinik, Hannover:** H. J. Lück; **Krankenanstalt Mutterhaus der Borromäerinnen, Trier:** W. Dornoff; **Gynäkologische Abteilung des St. Josefshospital, Wiesbaden:** G. Hoffmann; **Gynäkologische Abteilung d. Marienhospitals, Universität Witten-Herdecke, Witten:** J. Hackmann, W. Bader.

**Hungary:** **SZOTE Onkoterápiás Klinika, Szeged:** Z. Kahan; **BM Központi Kórház, Budapest:** G. Pajkos, K. Kristo; **SOTE Radiológiai és Onkoterápiás Klinika, Budapest:** M. Dank; **Uzsoki Utcai Kórház, Budapest:** T. Nagykálnai, L. Landherr; **Almási Balogh Pál Kórház, Ózd:** E. Kner; **Területi Kórház Onkologia, Szentes:** M. Kispál; **Szent Borbála Kórház, Megyei Onkológiai Gondozó, Tatabánya:** Á. Dani.

**Italy:** **Policlinico S. Orsola-Malpighi, Bologna:** A. Martoni, C. Zamagni, S. Giaquinta, E. Piana; **Ospedale S. Croce, Fano:** R. Mattioli, L. Imperatori; **Istituto Clinica Humanitas, Milan/Rozzano:** A. Santoro, C. Carnaghi, L. Rimassa; **Azienda Ospedaliera San Filippo Neri, Rome:** G. Gasparini, G. Sciarretta, A. Morabito; **Az. Ospedaliera Treviglio-Caravaggio, Treviglio:** S. Barni, M. Cazzaniga, M. Cabiddu; **Policlinico Universitario (PUDG), Udine:** F. Puglisi; **Ospedale di Torrette, Ancona:** R. Cellerino, S. Antognoli, F. Freddari; **University of Cagliari, Policlinico Universitario, Cagliari:** G. Mantovani, E. Massa, G. Astara; **Ospedale Civile Feltre, Feltre:** R. Segati; **Istituto Nazionale Ricerca Cancro, Genova:** R. Rosso, L. Del Mastro, M. Venturini, C. Bighin; **Istituto Nazionale dei Tumori, Milano:** E. Bajetta, N. Zilembo, D. Paleari, G. Procopio; **Azienda Ospedaliera di Parma, Parma:** S. Salvagni, M. A. Perrone, V. Franciosi; **Azienda Ospedaliera "S. Salvatore", Pesaro:** G. Catalano, S. Luzi Fedeli; **Azienda Ospedaliera "Ospedale di Circolo e Fondazione Macchi" Varese:** G. Pinotti, G. Giardina, I. Vallini; **University of Cagliari, Policlinico Universitario, Cagliari:** B. Massidda, M. T. Ionta, M. C. Deidda; **Ospedale Maggiore, Lodi:** G. Nalli, G. Sita; **Policlinico Universitario, Palermo:** I. Carreca, S. Cucciarré, D. Burgio; **Ospedale Civile dello Spirito Santo, Pescara:** M. Lombardo, G. Pandoli, P. Di Stefano; **Azienda Ospedaliera Santa Maria Nuova, Reggio Emilia:** C. Boni, G. Bisagni, M. C. Banzi, P. Linarello; **Azienda Ospedaliera Desenzano del Garda, Manerbio:** G. Colosini, A. Spasiano, A. Caldonazzo; **Ospedale Civile ASL 20, Tortona:** M. G. Pacquola.

**Netherlands:** **Ziekenhuis Leyenburg, Den Haag:** H. P. Sleeboom; **Catharina Ziekenhuis, Eindhoven:** H. J. T. Rutten; **St. Anna Ziekenhuis, Geldrop:** E. J. T. Luiten; **Tweesteden Ziekenhuis, Tilburg:** H. Th. J. Roerdink; **Maxima Medisch Centrum, Veldhoven:** R. H. M. Roumen.

**New Zealand:** **Dunedin Hospital, Dunedin:** B. McLaren, S. Costello, J. North, D. Perez, K., Bayston, M. Pfeiffer; **Waikato Hospital, Hamilton:** I. Kennedy, I. D. Campbell, L. Gilbert, R. Gannaway, M. Jameson, J. Long, G. Round, L. Spellman, D. Whittle, D. Woolerton.

**Poland:** **Department of Oncology and Radiotherapy, Medical University of Gdansk, Gdansk:** J. Jassem, M. Welnicka-Jaskiewicz, E. Senkus-Konefka, K. Matuszewska; **Rydygier's Memorial Hospital, Krakow-Nova Huta:** P. Koralewski, J. Pernal; **Klinika Nowotworów Piersi i, Chirurgii Rekonstrukcyjnej-Warszawa, Warszawa:** T. Pienkowski, E. Brewczynska, B. Bauer-Kosinska, R. Sienkiewicz-Kozłowska, A. Jagiello-Gruszfild, K. Sudol; **Centrum Onkologii w Bydgoszczy, Oddział Onkologii Klinicznej, Bydgoszcz:** J. Tujakowski, B. Zurawski; **Collegium Medicum Jagiellonian University, Krakow:** J. Pawlega, E. Jablonska, A. Zygulska; **Oddział**

**Kliniczny Onkologiczny, Centralnego Szpitala Klinicznego Wojskowej, Akademii Medycznej-Warszawa,** Warszawa: M. Górnasiowa; **Dolnoslaskie Centrum Onkologii, Wrocław:** E. Filipezyk-Cisarz, K. Pajak.

**Portugal: Hospital de S. João, Porto:** M. Damasceno; **Instituto Português de Oncologia de Coimbra,** Coimbra: J. Q. Albano; **Hospital de Santa Maria, Lisboa:** B. da Costa, L. Costa; **Instituto Português de Oncologia de Lisboa,** Lisboa: A. Henriques, H. Amaral; **Hospital Geral de Santo António, Porto:** F. Marques.

**Russia: Cancer Research Centre, Moscow:** D. V. Komov, S. B. Polikarpova; **Moscow Municipal Hospital No. 62,** Moscow: A. N. Makhson, N. V. Zabaznyi; **Moscow Research Institute of Diagnostics and Surgery,** Moscow: E. K. Vozny, N. Y. Dobrovolskaya, S. Bolshakova, O. V. Yurgina; **N. M. Emmanuel Institute of Biochemical Physics,** Moscow: D. B. Korman, I. A. Maslova; **N.N. Petrov Research Institute of Oncology, St. Petersburg:** V. Semiglazov, V. Ivanov; **Saint-Petersburg City Oncological Dispensary,** St. Petersburg: G. Manikhas, G. Dolmatov.

**South Africa: Mamma Clinic, Tygerberg Hospital, Cape Town:** J. Apffelstaedt; **Southern Cross Hospital, Cape Town:** D. Eedes; **Pretoria Academic Hospital,** Pretoria: C. Slabber; **Pretoria East Hospital,** Pretoria: M. A. Coccia-Portugal; **Eastern Cape Oncology Centre, Port Elizabeth:** K. Maart.

**Spain: Hospital Ruber Internacional, Madrid:** J. E. Alés Martínez, P. Aramburo, R. Sánchez; **Hospital Son Dureta, Palma del Mallorca:** J. Rifa, J. Martín; **Centro Oncológico Integral de Madrid (CONIM),** Madrid: R. Pérez-Carrión, J. L. González Larriba, A. Cubillo; **Hospital Universitario San Carlos, Madrid:** M. M. Jiménez, A. Casado; **Hospital Central de Asturias, Oviedo:** J. Fra, J. M. Vieitez, E. Esteban, A. J. Lacave.

**Switzerland: Universitätsfrauenklinik, Basel:** E. Wight, S. Bartens, R. Decio, U. Güth; **Klinik am Park, Zürich:** U. Breitenstein.

**Turkey: Ankara University Ibni Sina Hospital,** Ankara: F. Icli, D. Dincol; **Hacettepe University Oncology Institute,** Ankara: E. Baltali, Y. Ozisik; **Istanbul University Oncology Institute,** Istanbul: E. Topuz, M. Basaran, A. Aydiner; **Ege University Medical School, Izmir:** E. Ozdedeli; **9 Eylul University Medical School, Izmir:** O. Harmancioglu, A. U. Yilmaz.

**United Kingdom: The Royal Marsden Hospital, London, Royal Marsden NHS Trust, Surrey:** I. E. Smith; **University of Dundee,** Dundee: A. M. Thompson; **Christie Hospital NHS Trust, South Manchester University Hospital Trust,** Manchester: A. Wardley; **Royal Bournemouth Hospital,** Bournemouth: T. Hickish; **North Middlesex Hospital, London:** F. Neave.

**Uruguay: Hospital de Clinicas Dr. Manuel Quintela, Montevideo,** Uruguay: G. Sabini.



Section 2. Supplementary Tables and Figures

Figure A1. Consort diagram describing BIG 1-98 monotherapy and sequential treatment analysis populations

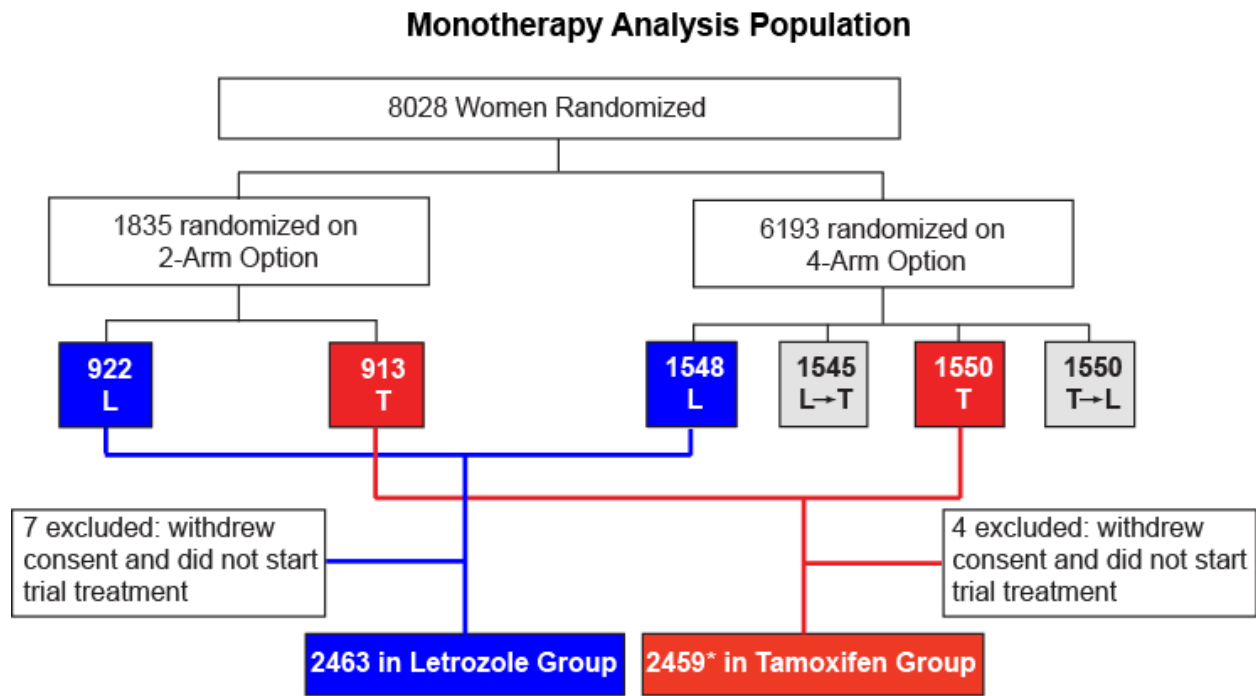

\*619 patients (25.2%) received letrozole after the tamoxifen arm was unblinded (selective crossover).

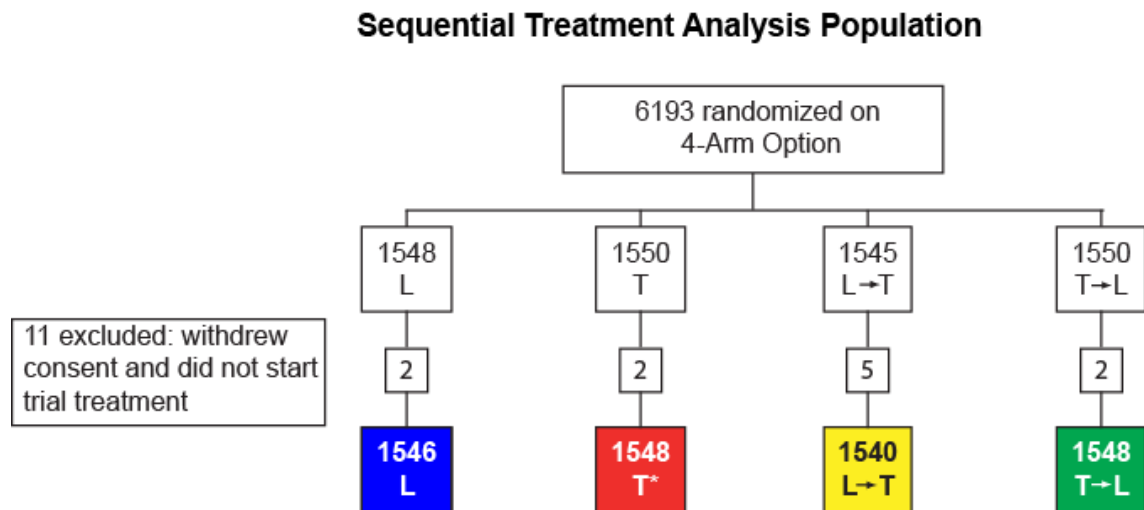

\* 612 patients (38.6%) received letrozole after the tamoxifen-alone arm was unblinded (selective crossover).

Sites of first disease-free survival (DFS) event are summarized in Tables A1 and A2 for the monotherapy analysis and sequential treatment analysis, respectively. Table A3 and Figure A2 present Kaplan-Meier estimates for the sequential treatment analysis for disease-free survival, overall survival, distant recurrence-free interval and breast cancer-free interval. Figure A3 shows a Subpopulation Treatment Effect Pattern Plot (STEPP) analysis of 5-year disease-free survival (DFS) according to level of composite measure of prognostic risk (A) among all patients, (B) according to treatment assignment.

**Table A1. Monotherapy analysis: Sites of first disease-free survival (DFS) event at 8.7 years median follow-up**

|                                  | Letrozole |      | Tamoxifen* |      |
|----------------------------------|-----------|------|------------|------|
|                                  | N         | %    | N          | %    |
| <i>N. patients</i>               | 2463      |      | 2459       |      |
| DFS event                        | 646       | 26.2 | 727        | 29.6 |
| Site of first DFS event:         |           |      |            |      |
| Local                            | 39        | 1.6  | 56         | 2.3  |
| Contralateral breast             | 40        | 1.6  | 65         | 2.6  |
| Regional                         | 21        | 0.9  | 22         | 0.9  |
| Distant soft tissue              | 23        | 0.9  | 26         | 1.1  |
| Bone                             | 119       | 4.8  | 126        | 5.1  |
| Viscera                          | 143       | 5.8  | 150        | 6.1  |
| Second (non-breast) malignancy   | 133       | 5.4  | 149        | 6.1  |
| Death without prior cancer event | 111       | 4.5  | 126        | 5.1  |
| Unknown                          | 17        | 0.7  | 7          | 0.3  |

\*619 patients selectively crossed over and received letrozole after tamoxifen arm was unblinded.

**Table A2. Sequential treatment analysis: Sites of first disease-free survival (DFS) event at 8.0 years median follow-up**

|                                  | Letrozole |      | Letrozole→<br>Tamoxifen |      | Tamoxifen→<br>Letrozole |      | Tamoxifen* |      |
|----------------------------------|-----------|------|-------------------------|------|-------------------------|------|------------|------|
|                                  | N         | %    | N                       | %    | N                       | %    | N          | %    |
| <i>N. Patients</i>               | 1546      |      | 1540                    |      | 1548                    |      | 1548       |      |
| DFS event                        | 329       | 21.3 | 348                     | 22.6 | 353                     | 22.8 | 371        | 24.0 |
| Site of first DFS event:         |           |      |                         |      |                         |      |            |      |
| Local                            | 19        | 1.2  | 26                      | 1.7  | 22                      | 1.4  | 21         | 1.4  |
| Contralateral breast             | 27        | 1.7  | 28                      | 1.8  | 27                      | 1.7  | 39         | 2.5  |
| Regional                         | 8         | 0.5  | 7                       | 0.5  | 6                       | 0.4  | 10         | 0.6  |
| Distant soft tissue              | 10        | 0.6  | 12                      | 0.8  | 6                       | 0.4  | 7          | 0.5  |
| Bone                             | 58        | 3.8  | 61                      | 4.0  | 77                      | 5.0  | 58         | 3.7  |
| Viscera                          | 75        | 4.9  | 81                      | 5.3  | 87                      | 5.6  | 78         | 5.0  |
| Second (non-breast) malignancy   | 85        | 5.5  | 81                      | 5.3  | 89                      | 5.7  | 89         | 5.7  |
| Death without prior cancer event | 40        | 2.6  | 50                      | 3.2  | 34                      | 2.2  | 65         | 4.2  |
| Unknown                          | 7         | 0.5  | 2                       | 0.1  | 5                       | 0.3  | 4          | 0.3  |

\*612 patients selectively crossed over and received letrozole after tamoxifen arm was unblinded.

**Table A3. Sequential treatment analysis: 5-year and 8-year estimates of the four endpoints calculated by the Kaplan-Meier method.**

|                    | Letrozole | Letrozole→<br>Tamoxifen | Tamoxifen→<br>Letrozole | Tamoxifen*<br>(IPCW) | Tamoxifen*<br>(ITT) |
|--------------------|-----------|-------------------------|-------------------------|----------------------|---------------------|
| Number of patients | 1546      | 1540                    | 1548                    | 1548                 | 1548                |
| DFS %              |           |                         |                         |                      |                     |
| 5-year estimates   | 87.6      | 87.4                    | 86.2                    | 83.6                 | 84.5                |
| (SE)               | (0.8)     | (0.8)                   | (0.9)                   | (1.0)                | (0.9)               |
| 8-year estimates   | 78.6      | 77.8                    | 77.3                    | 74.9                 | 76.8                |
| (SE)               | (1.1)     | (1.1)                   | (1.1)                   | (1.4)                | (1.1)               |
| OS %               |           |                         |                         |                      |                     |
| 5-year estimates   | 93.3      | 93.6                    | 92.5                    | 92.1                 | 92.6                |
| (SE)               | (0.6)     | (0.6)                   | (0.7)                   | (0.7)                | (0.7)               |
| 8-year estimates   | 87.5      | 87.7                    | 85.9                    | 82.9                 | 86.2                |
| (SE)               | (0.9)     | (0.9)                   | (0.9)                   | (1.3)                | (0.9)               |
| DRFI %             |           |                         |                         |                      |                     |
| 5-year estimates   | 94.1      | 93.4                    | 92.3                    | 91.9                 | 92.0                |
| (SE)               | (0.6)     | (0.6)                   | (0.7)                   | (0.7)                | (0.7)               |
| 8-year estimates   | 89.9      | 88.7                    | 88.1                    | 88.2                 | 89.4                |
| (SE)               | (0.8)     | (0.9)                   | (0.9)                   | (1.0)                | (0.8)               |
| BCFI %             |           |                         |                         |                      |                     |
| 5-year estimates   | 92.5      | 92.4                    | 90.4                    | 89.3                 | 90.0                |
| (SE)               | (0.7)     | (0.7)                   | (0.8)                   | (0.9)                | (0.8)               |
| 8-year estimates   | 86.1      | 85.3                    | 84.3                    | 84.2                 | 85.9                |
| (SE)               | (1.0)     | (1.0)                   | (1.0)                   | (1.1)                | (0.9)               |

Only patients enrolled in the 4-arm option are included in Table A3. Median follow up was 8.0 years.

\*612 patients selectively crossed over and received letrozole after tamoxifen arm was unblinded. Both IPCW and ITT estimates are shown for the tamoxifen arm patients enrolled in the 4-arm option of the trial.

**Figure A2. Kaplan-Meier Plots for the Sequential Treatment Analysis: (A) disease-free survival (DFS); (B) overall survival (OS); (C) distant recurrence-free interval (DRFI); and (D) breast cancer-free interval (BCFI)**

Inverse probability of censoring weighted (IPCW) Kaplan-Meier estimates are shown for the tamoxifen monotherapy arm. Intention-to-treat (ITT) estimates are shown for the letrozole-containing regimens. The median follow-up time is 8.0 years.

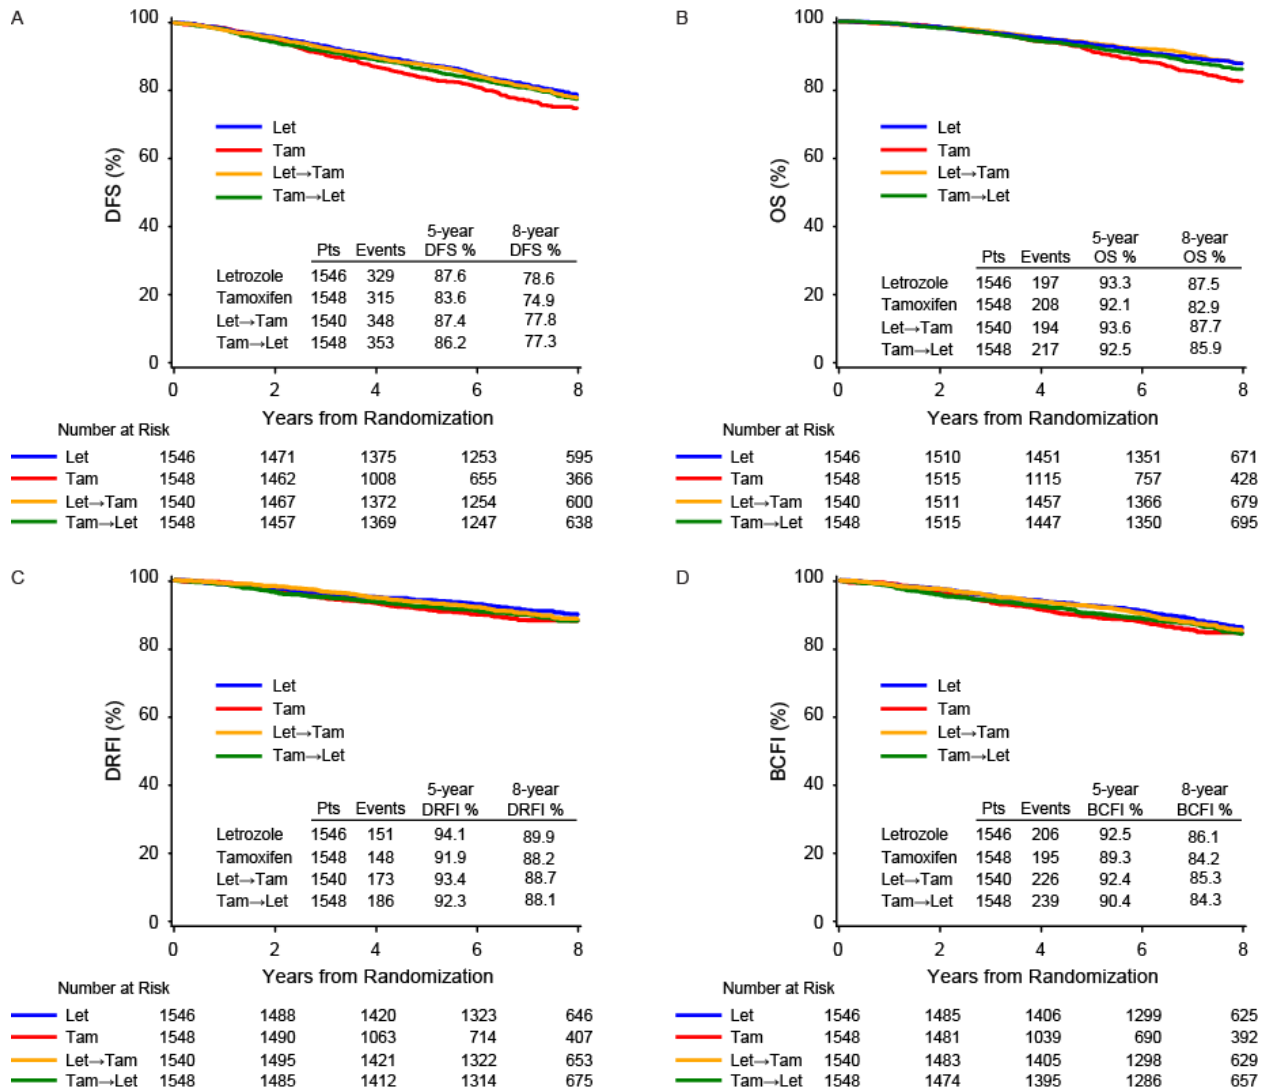

**Figure A3. Subpopulation Treatment Effect Pattern Plot (STEPP) analysis of 5-year disease-free survival (DFS) according to level of composite measure of prognostic risk (A) among all patients, (B) according to treatment assignment**

The STEPP plots show the 5-year DFS percent (vertical axis) for overlapping subpopulations of patients with increasing levels of the composite measure of prognostic risk (median risk for each subpopulation is shown along the horizontal axis). Rug plots along the x-axis display the distribution of individual values. Reprinted with permission of *Ann Oncol* (Viale et al <sup>1</sup>).

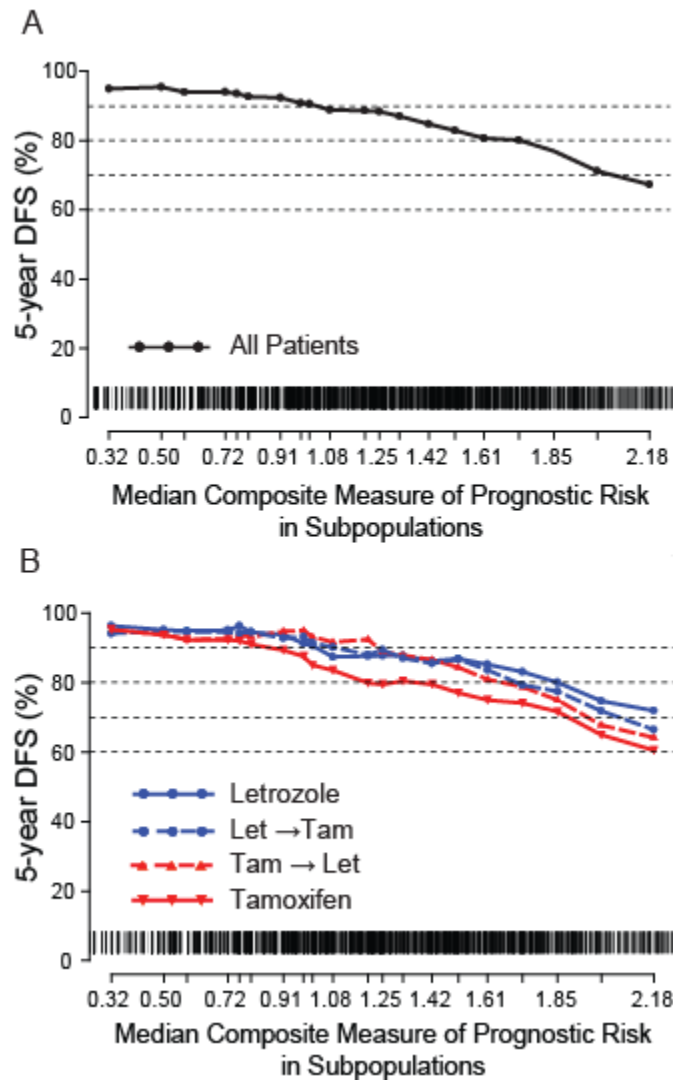

**REFERENCES**

1. Viale G, Regan MM, Dell’Orto P, et al. Which patients benefit most from adjuvant aromatase inhibitors? Results using a composite measure of prognostic risk in the BIG 1-98 randomized trial. *Ann Oncol* 2011; **22**:2216-26.
